# Supplementary material for: WS2 supported PtOx clusters for efficient photocatalytic CO2 reduction: a DFT study
Source: Royal Society of Chemistry journal article supplement (doi:10.1039/d3cp03592a), 2023-01-01
Supplement: d3cp03592a1.pdf [file d3cp03592a1.pdf]

**Electronic Supplementary Information for**  
**WS<sub>2</sub> supported PtO<sub>x</sub> cluster for efficient photocatalytic CO<sub>2</sub>**  
**reduction: A DFT study**

Linghao Zhu<sup>a</sup>, Cong Qin<sup>a</sup>, Yan Wang<sup>\*b</sup>, Jianliang Cao<sup>\*ab</sup>

<sup>a</sup> College of Chemistry and Chemical Engineering, Henan Polytechnic University, Jiaozuo 454000, China

<sup>b</sup> State Collaborative Innovation Center of Coal Work Safety and Clean-efficiency Utilization, Henan Polytechnic University, Jiaozuo 454000, China

\*Corresponding author

E-mail: yanwang@hpu.edu.cn (Y. Wang), caojianliang@hpu.edu.cn (J. Cao)

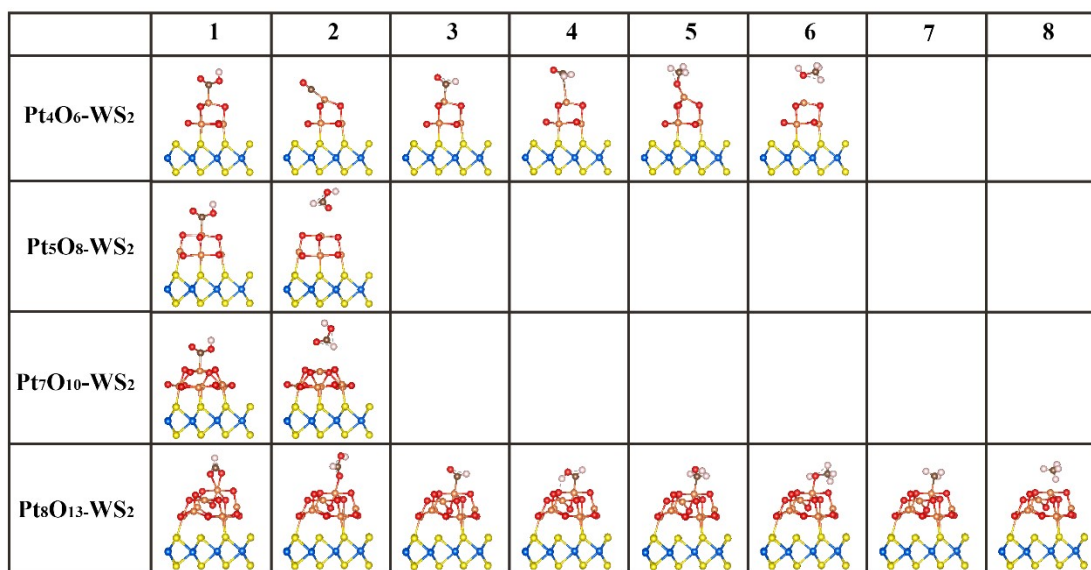

**Figure S1** Most stable structures for the most favorable pathways.

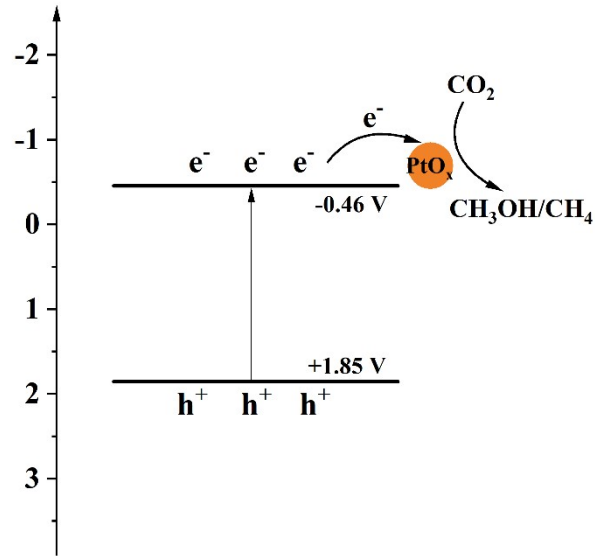

**Figure S2** Schematic of the photocatalytic reduction of  $\text{CO}_2$  on  $\text{PtO}_x\text{-WS}_2$ .

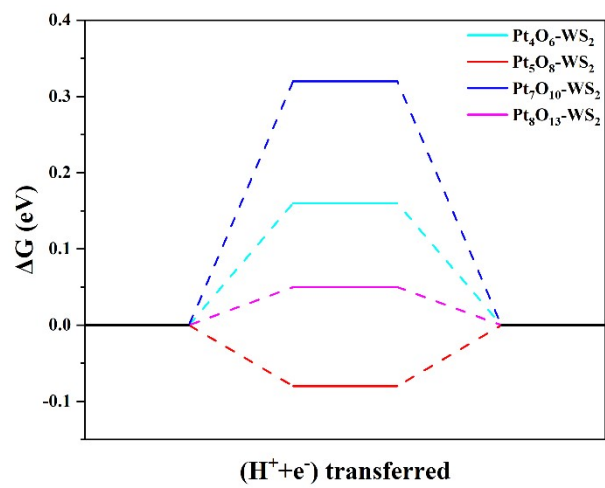

**Figure S3** Gibbs free energy diagram of HER.
